# Supplementary material for: The Species Richness-Environment Relationship for Cherries (Prunus subgenus Cerasus) across the Northern Hemisphere
Source: MDPI journal article supplement (doi:10.3390/f14020193), 2023-01-19
Supplement: s1 [file s1]

**Table S1** List of *Cerasus* species and distribution

| Scientific Name                                | North America | Europe | Asia | Growth Form           |
|------------------------------------------------|---------------|--------|------|-----------------------|
| <i>Prunus apetala</i>                          | 0             | 0      | 1    | trees                 |
| <i>Prunus apetala</i> var. <i>pilosa</i>       | 0             | 0      | 1    | trees                 |
| <i>Prunus avium</i>                            | 0             | 1      | 0    | trees                 |
| <i>Prunus campanulata</i>                      | 0             | 0      | 1    | trees or shrubs       |
| <i>Prunus caudata</i>                          | 0             | 0      | 1    | trees                 |
| <i>Prunus cerasoides</i>                       | 0             | 0      | 1    | trees                 |
| <i>Prunus clarofolia</i>                       | 0             | 0      | 1    | small trees or shrubs |
| <i>Prunus conadenia</i>                        | 0             | 0      | 1    | trees or shrubs       |
| <i>Prunus conradinae</i>                       | 0             | 0      | 1    | trees                 |
| <i>Prunus crataegifolia</i>                    | 0             | 0      | 1    | shrubs                |
| <i>Prunus cyclamina</i>                        | 0             | 0      | 1    | trees                 |
| <i>Prunus cyclamina</i> var. <i>biflora</i>    | 0             | 0      | 1    | trees                 |
| <i>Prunus dielsiana</i>                        | 0             | 0      | 1    | trees or shrubs       |
| <i>Prunus dielsiana</i> var. <i>abbreviata</i> | 0             | 0      | 1    | trees or shrubs       |
| <i>Prunus discadenia</i>                       | 0             | 0      | 1    | trees or shrubs       |
| <i>Prunus discoidea</i>                        | 0             | 0      | 1    | small trees           |
| <i>Prunus dolichadenia</i>                     | 0             | 0      | 1    | small trees or shrubs |
| <i>Prunus emarginata</i>                       | 1             | 0      | 0    | small trees or shrubs |
| <i>Prunus emarginata</i> var. <i>mollis</i>    | 1             | 0      | 0    | small trees or shrubs |
| <i>Prunus fengyangshanica</i>                  | 0             | 0      | 1    | trees                 |
| <i>Prunus fruticosa</i>                        | 0             | 1      | 0    | shrubs                |
| <i>Prunus hainanensis</i>                      | 0             | 0      | 1    | trees                 |
| <i>Prunus harae</i>                            | 0             | 0      | 1    | small trees           |
| <i>Prunus hefengensis</i>                      | 0             | 0      | 1    | trees                 |
| <i>Prunus henryi</i>                           | 0             | 0      | 1    | trees                 |
| <i>Prunus himalaica</i>                        | 0             | 0      | 1    | small trees or shrubs |
| <i>Prunus incisa</i>                           | 0             | 0      | 1    | small trees or shrubs |
| <i>Prunus incisa</i> var. <i>bukosanensis</i>  | 0             | 0      | 1    | small trees or shrubs |
| <i>Prunus incisa</i> var. <i>kinkiensis</i>    | 0             | 0      | 1    | small trees or shrubs |
| <i>Prunus kingdonwardii</i>                    | 0             | 0      | 1    | small trees           |
| <i>Prunus kumanoensis</i>                      | 0             | 0      | 1    | trees                 |
| <i>Prunus leveilleana</i>                      | 0             | 0      | 1    | trees                 |
| <i>Prunus mahaleb</i>                          | 0             | 1      | 1    | trees or shrubs       |
| <i>Prunus matuurai</i>                         | 0             | 0      | 1    | trees                 |
| <i>Prunus maximowiczii</i>                     | 0             | 0      | 1    | trees                 |
| <i>Prunus mugus</i>                            | 0             | 0      | 1    | shrubs                |
| <i>Prunus nipponica</i>                        | 0             | 0      | 1    | shrubs                |
| <i>Prunus nipponica</i> var. <i>alpina</i>     | 0             | 0      | 1    | shrubs                |
| <i>Prunus nipponica</i> var. <i>kurilensis</i> | 0             | 0      | 1    | shrubs                |
| <i>Prunus nudiflora</i>                        | 0             | 0      | 1    | trees                 |
| <i>Prunus pananensis</i>                       | 0             | 0      | 1    | trees                 |
| <i>Prunus patentipila</i>                      | 0             | 0      | 1    | trees or shrubs       |

|                                                    |   |   |   |                       |
|----------------------------------------------------|---|---|---|-----------------------|
| <i>Prunus pensylvanica</i>                         | 1 | 0 | 0 | small trees or shrubs |
| <i>Prunus pensylvanica</i> var. <i>saximontana</i> | 1 | 0 | 0 | small trees or shrubs |
| <i>Prunus pleiocerasus</i>                         | 0 | 0 | 1 | trees                 |
| <i>Prunus polytricha</i>                           | 0 | 0 | 1 | trees or shrubs       |
| <i>Prunus pusilliflora</i>                         | 0 | 0 | 1 | trees or shrubs       |
| <i>Prunus rufa</i>                                 | 0 | 0 | 1 | trees                 |
| <i>Prunus sargentii</i>                            | 0 | 0 | 1 | trees                 |
| <i>Prunus schneideriana</i>                        | 0 | 0 | 1 | small trees           |
| <i>Prunus serrula</i>                              | 0 | 0 | 1 | trees                 |
| <i>Prunus serrulata</i>                            | 0 | 0 | 1 | trees                 |
| <i>Prunus serrulata</i> f. <i>spontanea</i>        | 0 | 0 | 1 | trees                 |
| <i>Prunus serrulata</i> var. <i>pubescens</i>      | 0 | 0 | 1 | trees                 |
| <i>Prunus setulosa</i>                             | 0 | 0 | 1 | small trees or shrubs |
| <i>Prunus shikokuensis</i>                         | 0 | 0 | 1 | trees                 |
| <i>Prunus singalilaensis</i>                       | 0 | 0 | 1 | shrubs                |
| <i>Prunus spachiana</i>                            | 0 | 0 | 1 | trees                 |
| <i>Prunus spachiana</i> f. <i>ascendens</i>        | 0 | 0 | 1 | trees                 |
| <i>Prunus spachiana</i> var. <i>koshiensis</i>     | 0 | 0 | 1 | trees                 |
| <i>Prunus speciosa</i>                             | 0 | 0 | 1 | trees                 |
| <i>Prunus stipulacea</i>                           | 0 | 0 | 1 | small trees or shrubs |
| <i>Prunus sunhangii</i>                            | 0 | 0 | 1 | trees                 |
| <i>Prunus szechuanica</i>                          | 0 | 0 | 1 | trees or shrubs       |
| <i>Prunus takasagomontana</i>                      | 0 | 0 | 1 | trees                 |
| <i>Prunus takesimensis</i>                         | 0 | 0 | 1 | trees                 |
| <i>Prunus taplejunica</i>                          | 0 | 0 | 1 | shrubs                |
| <i>Prunus tatsienensis</i>                         | 0 | 0 | 1 | small trees or shrubs |
| <i>Prunus topkegolensis</i>                        | 0 | 0 | 1 | shrubs                |
| <i>Prunus transarisanensis</i>                     | 0 | 0 | 1 | trees                 |
| <i>Prunus trichantha</i>                           | 0 | 0 | 1 | trees                 |
| <i>Prunus trichostoma</i>                          | 0 | 0 | 1 | trees or small trees  |
| <i>Prunus wangii</i>                               | 0 | 0 | 1 | trees                 |
| <i>Prunus xingshanensis</i>                        | 0 | 0 | 1 | trees or shrubs       |
| <i>Prunus xueluoensis</i>                          | 0 | 0 | 1 | shrubs                |
| <i>Prunus yaoiana</i>                              | 0 | 0 | 1 | small trees or shrubs |
| <i>Prunus yedoensis</i>                            | 0 | 0 | 1 | trees                 |
| <i>Prunus yunnanensis</i>                          | 0 | 0 | 1 | trees                 |
| <i>Prunus yunnanensis</i> var. <i>polybotrys</i>   | 0 | 0 | 1 | trees                 |

Note: 0 – absent, 1 – present
